# Supplementary material
Source: PubMed Central journal article supplement (PMC3382935)

## **SUPPLEMENTARY FIGURE LEGENDS**

**Supplementary Figure 1. NK cells fail to eradicate tumor when co-injected at high E:T ratios.**  $1 \times 10^6$  C57BL/6 or FVB NK cells were co-injected at the same time as  $1 \times 10^4$  A20 cells into Balb/c mice and followed for survival' p-0.45. Representative of two independent experiments.

**Supplementary Figure 2. Tumor-infiltrating NK cells downregulate activating receptors and demonstrate impaired function** (A) Phenotype and sorting strategy of naïve NK cells derived from CD45.1<sup>+</sup> donor mice; top panel shows phenotype post-magnetic enrichment and the bottom panel shows the post-FACS sorting phenotype and purity. (B) Expression of activating and inhibitory Ly49 receptors and the inhibitory NKG2A/C/E receptors among transferred NK cells is similar to naïve or cultured NK cells. (C) FACS sorted CD3<sup>-</sup> DX5<sup>+</sup> or CD3<sup>-</sup> NK1.1<sup>+</sup> NK cells from CD45.1<sup>+</sup> congenic donors were transferred into CD45.2<sup>+</sup> recipients along with a T cell-depleted bone marrow transplant from CD45.2<sup>+</sup> donors. All analyses are gated as indicated above each plot. Within the spleen of tumor-bearing mice that received NK cells, NKp46<sup>+</sup>, NKG2D<sup>+</sup> and most DX5<sup>+</sup> cells are absent in the transferred CD45.1<sup>+</sup> population when compared with the bone-marrow derived CD45.2<sup>+</sup> population. (D). Expression pattern of KLRG1, CD27 and CD11b shows a pattern of maturation of NK cells after in vivo transfer. Results are representative of 2-3 independent experiments.

**Supplementary Figure 3. Prolonged exposure to tumor is sufficient to induce NK cell dysfunction and proliferation; loss of function correlates with proliferation (A)** Inhibition of NK cell function by tumor exposure is contact-dependent. Balb/c NK were cultured for 5 days alone, in contact with irradiated A20 cells, or separated from irradiated A20 cells by a transwell, then harvested for use in a standard chromium release assay. **(B)** Signaling through NKG2D is not required for the observed cytotoxic dysfunction. Sorted wild-type (left) or NKG2D<sup>-/-</sup> (middle) NK cells were cultured alone or with irradiated A20 cells for five days then harvested for use in a standard chromium release against A20 targets at the indicated effector:target ratios (at right, statistical analysis at an ET ratio of 5:1); all indicated significance symbols indicate  $p < 0.001$  **(C)** IFN $\gamma$  and NKG2D expression on proliferated (CFSE low) or unproliferated (CFSE high) NK cells after a 5 day co-culture with tumor. Analyses were in triplicate **(A,B)** and represent 2 independent experiments.

**Supplementary Figure 4.** Expression of Eomes, Tbet and IFN $\gamma$  in naïve or IL2 stimulated cultured NK cells. NK cells were analysed for expression of transcription factors Eomes and T-bet as well as production of IFN $\gamma$  upon stimulation with PMA and ionomycin. NK cells were harvested from naïve spleens or from a 5 day culture with IL-2 1500 U/mL. Analyses represent 3 independent experiments.

# Suppl Fig 1

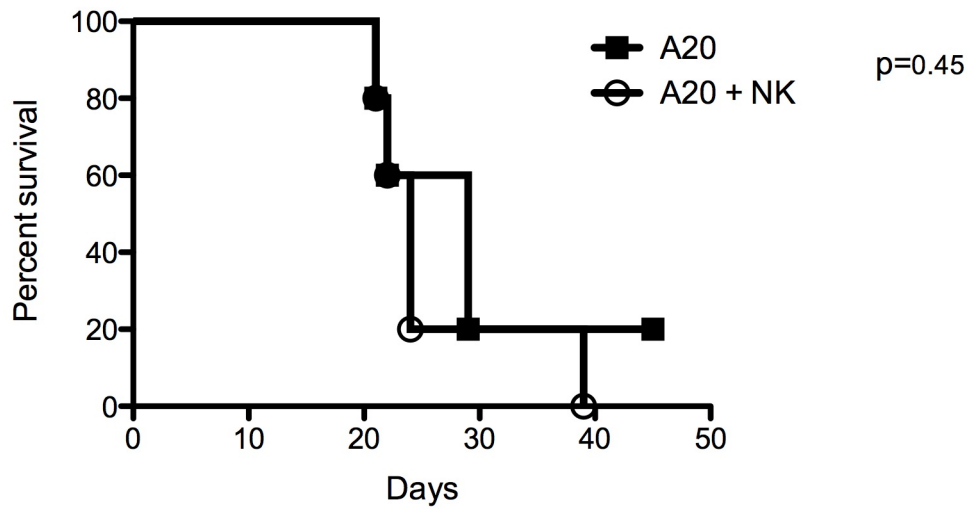

# Supp Figure 2

A.

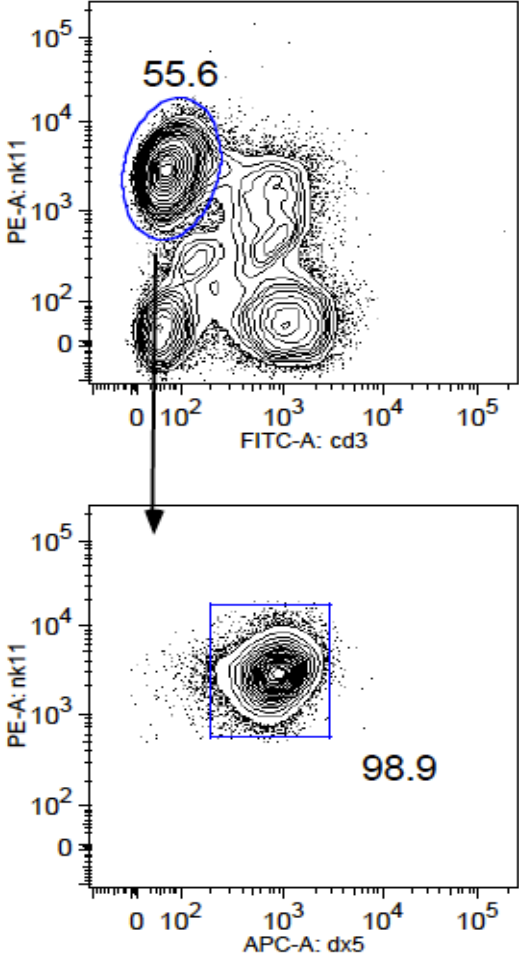

# Supp Figure 2

**B.**

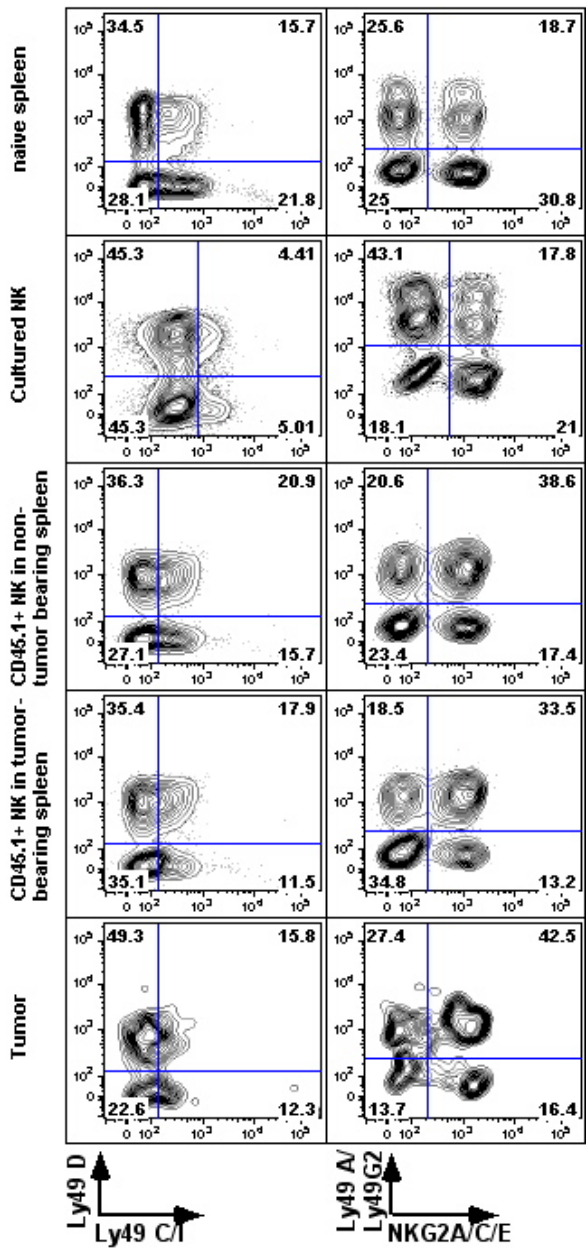

# Supp Figure 2

C.

Gated on live CD3- cells

Naive spleen (control)      Spleen of tumor-bearing mouse

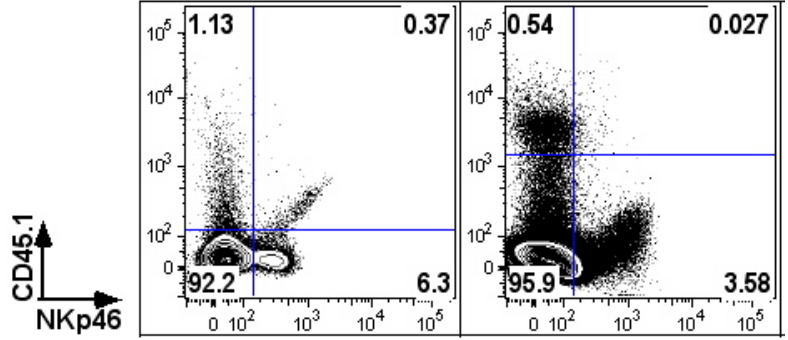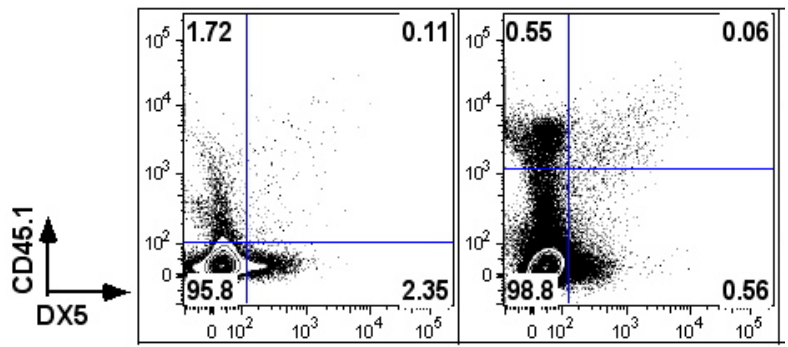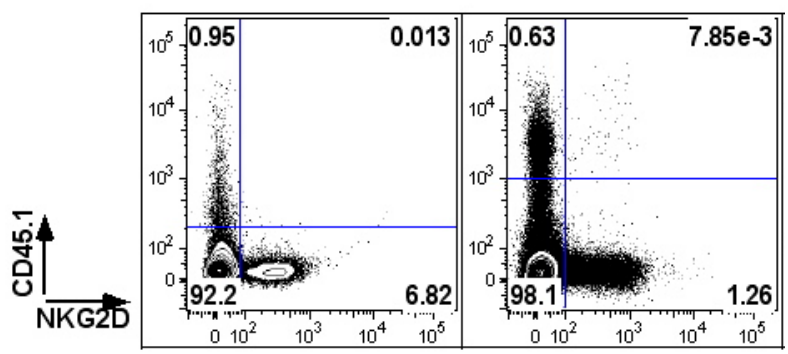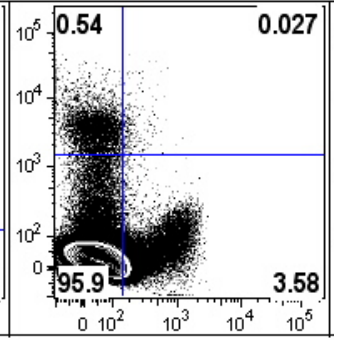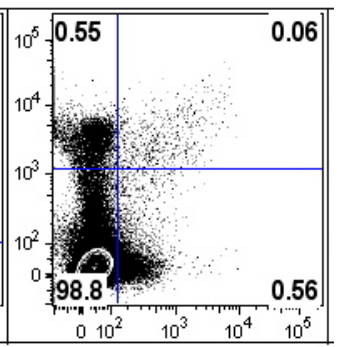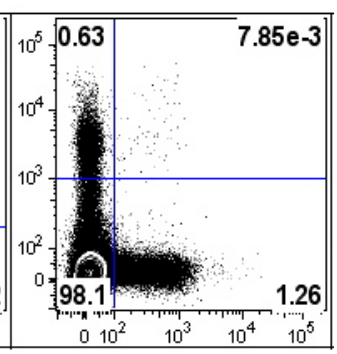

**D.**

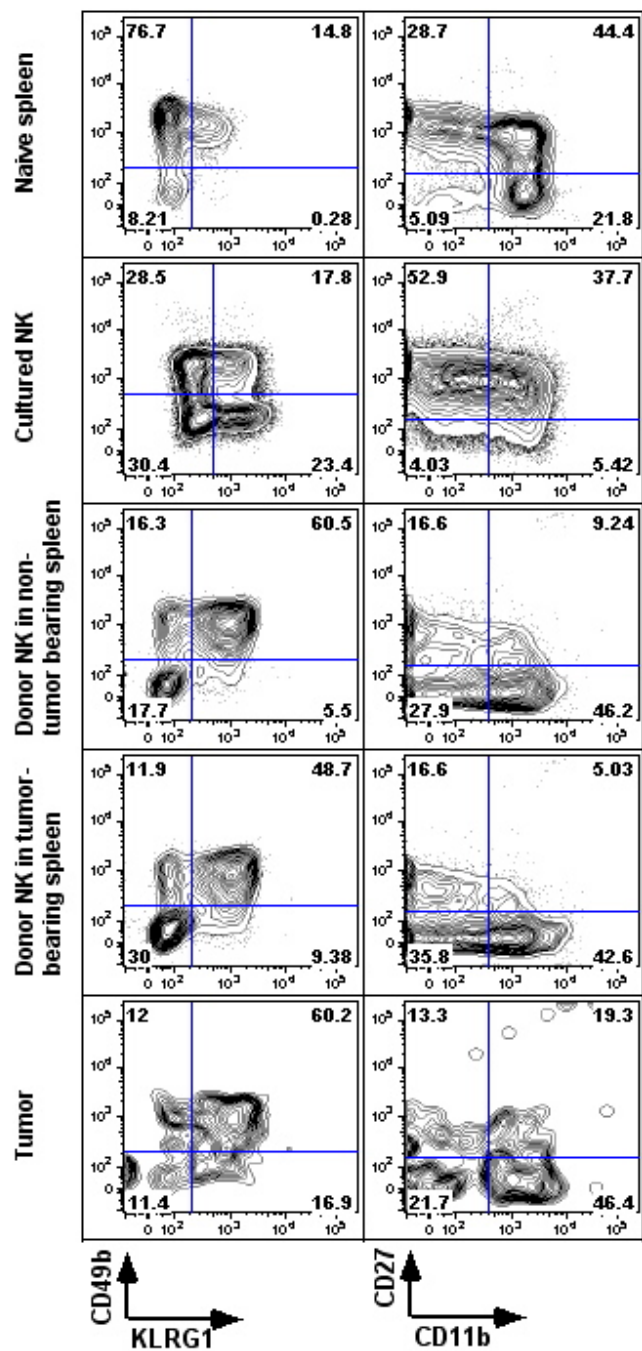

# Supp Figure 3

**A.**

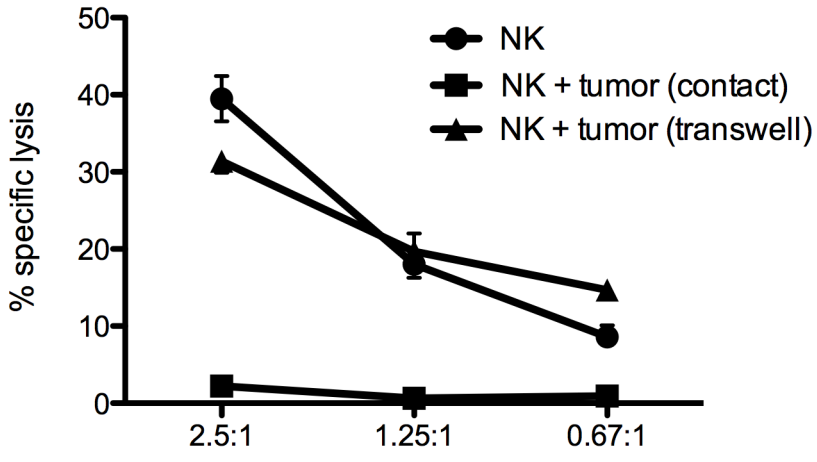

**B.**

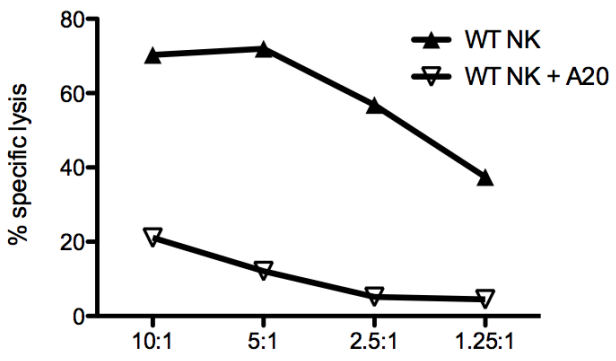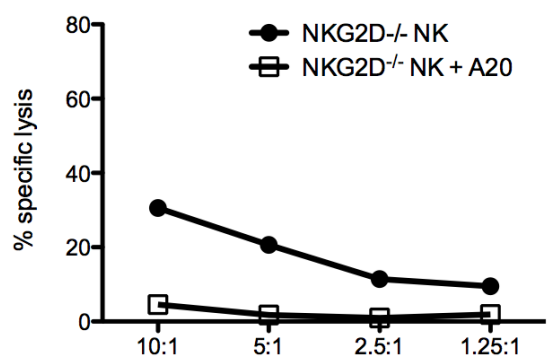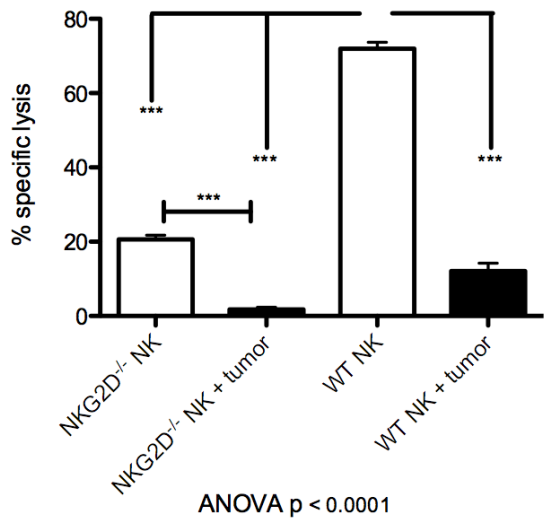



# Supp Figure 3

C.

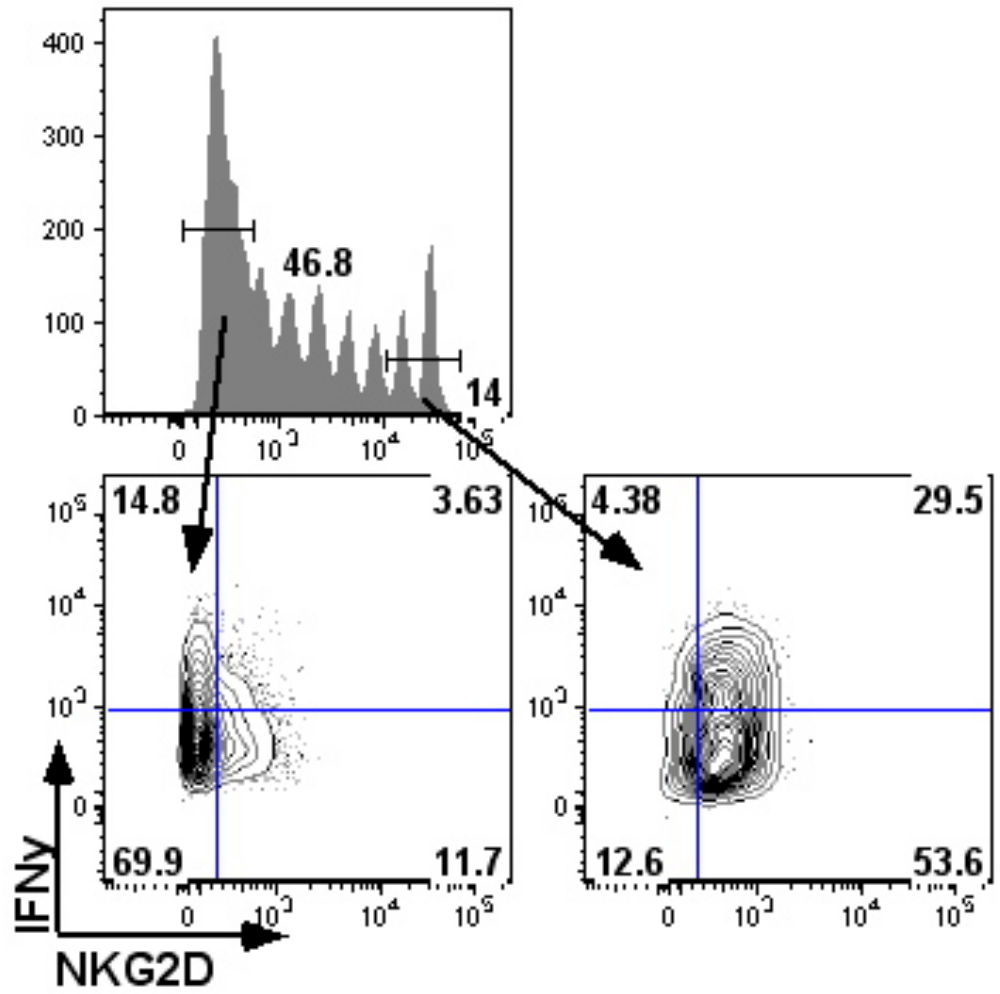

# Supp Figure 4

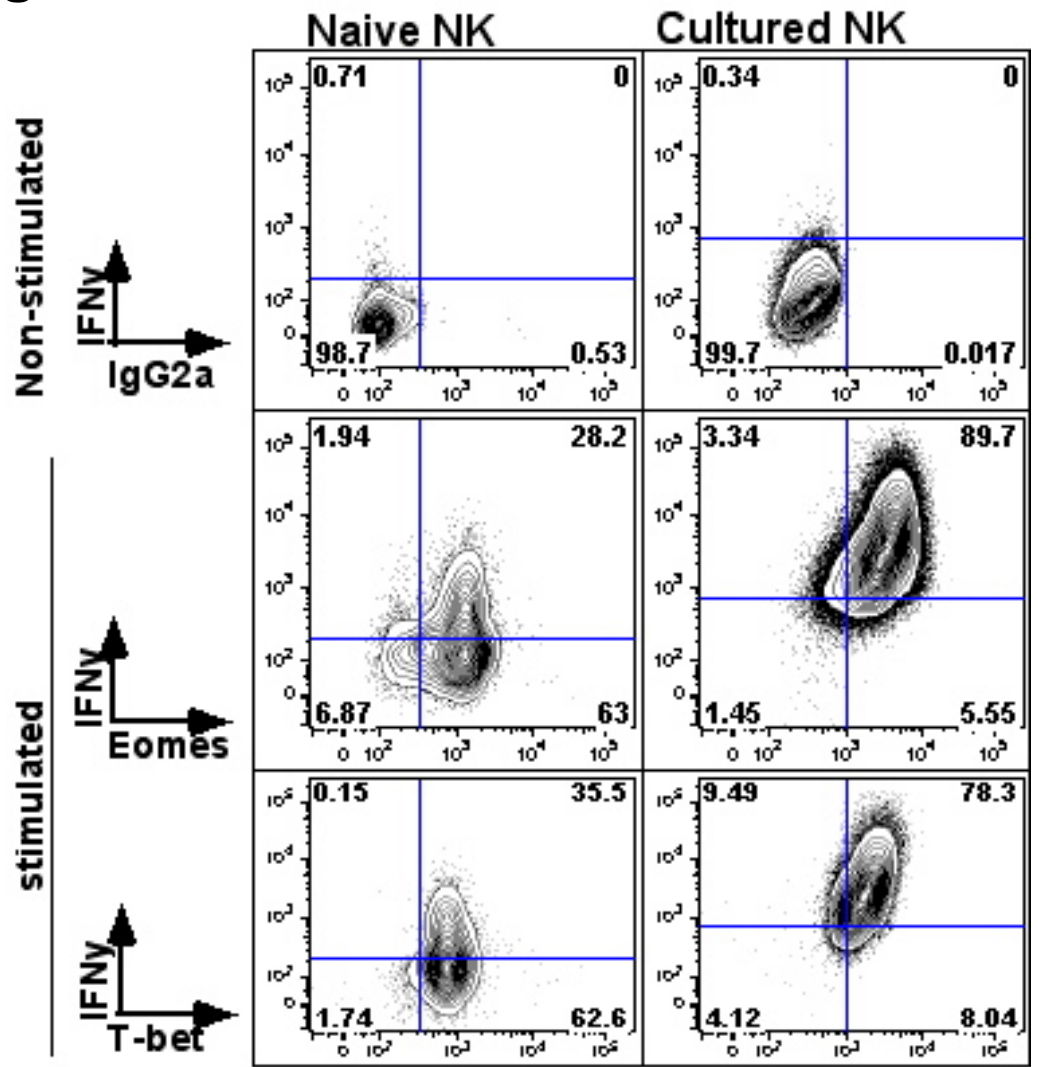

Supplement: supp_blood-2012-03-415364_Document1.pdf [file supp_blood-2012-03-415364_Document1.pdf]
